# Supplementary material for: Using microfluidic shear to assess transfusion requirements in trauma patients
Source: PubMed Central journal article supplement — Trauma Surg Acute Care Open. 2024 Jul 5;9(1):e001403. doi: 10.1136/tsaco-2024-001403 (PMC11227844; doi:10.1136/tsaco-2024-001403), 2024-07-05
Supplement: tsaco-2024-001403supp002.pdf [file tsaco-2024-001403supp002.pdf]

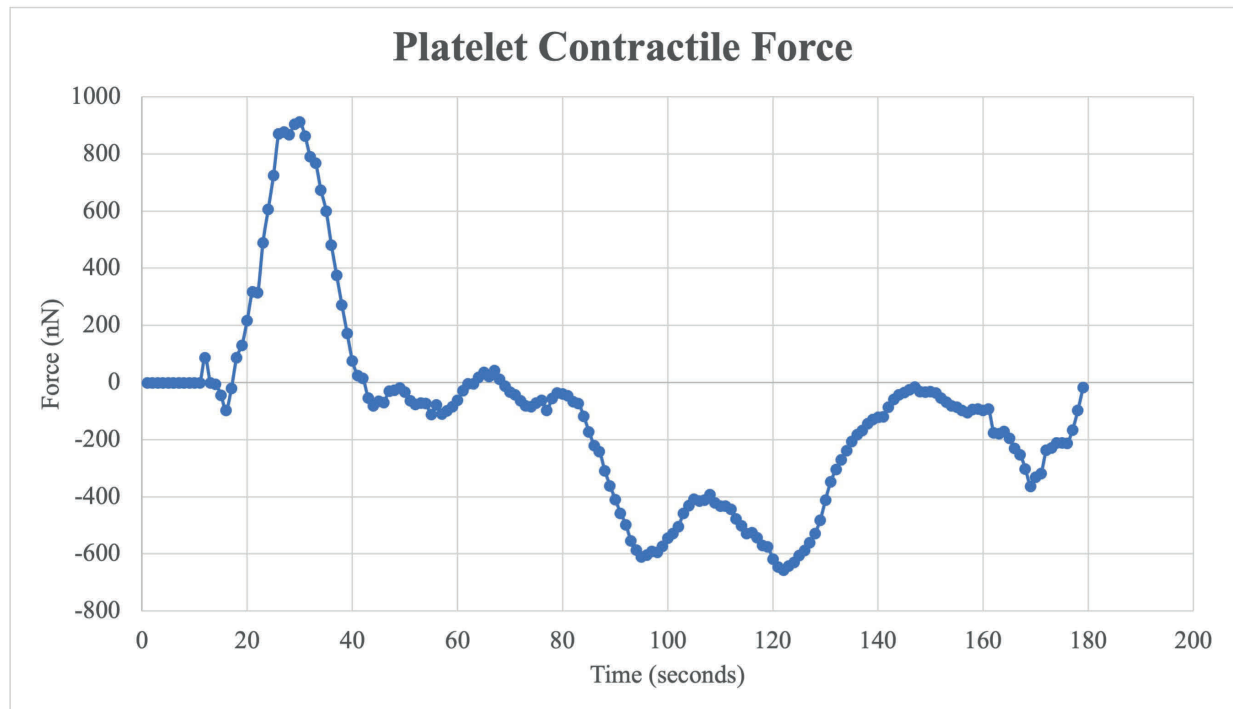

**SDC 2.** Example of tracing produced by Stasys analyzer which shows an initial spike in platelet contractile force, followed by a weakening of the clot and resulting "negative" force as the contractile force of the platelets are overcome by the dynamic flow of the blood through the cartridge and the post portion of the sensor bends away from the block portion, or in the direction of blood flow.
