# Supplementary material for: Using microfluidic shear to assess transfusion requirements in trauma patients
Source: PubMed Central journal article supplement — Trauma Surg Acute Care Open. 2024 Jul 5;9(1):e001403. doi: 10.1136/tsaco-2024-001403 (PMC11227844; doi:10.1136/tsaco-2024-001403), 2024-07-05
Supplement: tsaco-2024-001403supp003.pdf [file tsaco-2024-001403supp003.pdf]

|                                             | Uninjured Controls                  | Injured Patients                    | p-value |
|---------------------------------------------|-------------------------------------|-------------------------------------|---------|
| Maximum Platelet Contractile Force (PCF)    | 322.75<br>(IQR 229.48 - 388.83)     | 226.65<br>(IQR 139.44 - 344.71)     | 0.02*   |
| Cumulative Platelet Contractile Force (PCF) | 45815.24<br>(IQR 35751.97-70388.44) | 32545.98<br>(IQR 460.11 - 49311.35) | 0.006*  |
| Maximum Clot Area (CA)                      | 0.22<br>(IQR 0.15 - 0.27)           | 0.25<br>(IQR 0.17 - 0.34)           | 0.13    |
| Cumulative Clot Area (CA)                   | 44.06<br>(IQR 31.33 - 57.59)        | 57.77<br>(IQR 40.63 - 75.74)        | 0.03*   |

**SDC 3.** Comparison of median Stasys values between uninjured controls and injured patients. Medians were compared utilizing Mann Whitney U test and was reported with the corresponding interquartile range and p-value.

\*Indicates statistically significant findings of  $p \leq 0.05$
