# Supplementary material for: Using microfluidic shear to assess transfusion requirements in trauma patients
Source: PubMed Central journal article supplement — Trauma Surg Acute Care Open. 2024 Jul 5;9(1):e001403. doi: 10.1136/tsaco-2024-001403 (PMC11227844; doi:10.1136/tsaco-2024-001403), 2024-07-05
Supplement: tsaco-2024-001403supp004.pdf [file tsaco-2024-001403supp004.pdf]

|                                             | Patients Without Transfusions        | Transfused Patients                   | p-value |
|---------------------------------------------|--------------------------------------|---------------------------------------|---------|
| Maximum Platelet Contractile Force (PCF)    | 242.83<br>(IQR 140.71 - 350.87)      | 206.40<br>(IQR 141.81 - 283.00)       | 0.25    |
| Cumulative Platelet Contractile Force (PCF) | 32735.68<br>(IQR 4122.62 - 53522.50) | 25193.89<br>(IQR -9495.29 - 42007.53) | 0.18    |
| Maximum Clot Area (CA)                      | 0.25<br>(IQR 0.18 - 0.34)            | 0.26<br>(IQR 0.18 - 0.34)             | 0.60    |
| Cumulative Clot Area (CA)                   | 58.17<br>(IQR 39.19 - 76.90)         | 52.52<br>(IQR 44.77 - 71.95)          | 0.86    |

**SDC 4.** Comparison of median Stasys values between patients who did not receive any transfusions and those who received transfusions in the first 6 hours after presentation. Medians were compared utilizing Mann Whitney U test and was reported with the corresponding interquartile range and p-value.

\*Indicates statistically significant findings of  $p \leq 0.05$
