# Supplementary figures and images for: Using microfluidic shear to assess transfusion requirements in trauma patients
Source: PubMed Central journal article supplement — Trauma Surg Acute Care Open. 2024 Jul 5;9(1):e001403. doi: 10.1136/tsaco-2024-001403 (PMC11227844; doi:10.1136/tsaco-2024-001403), 2024-07-05

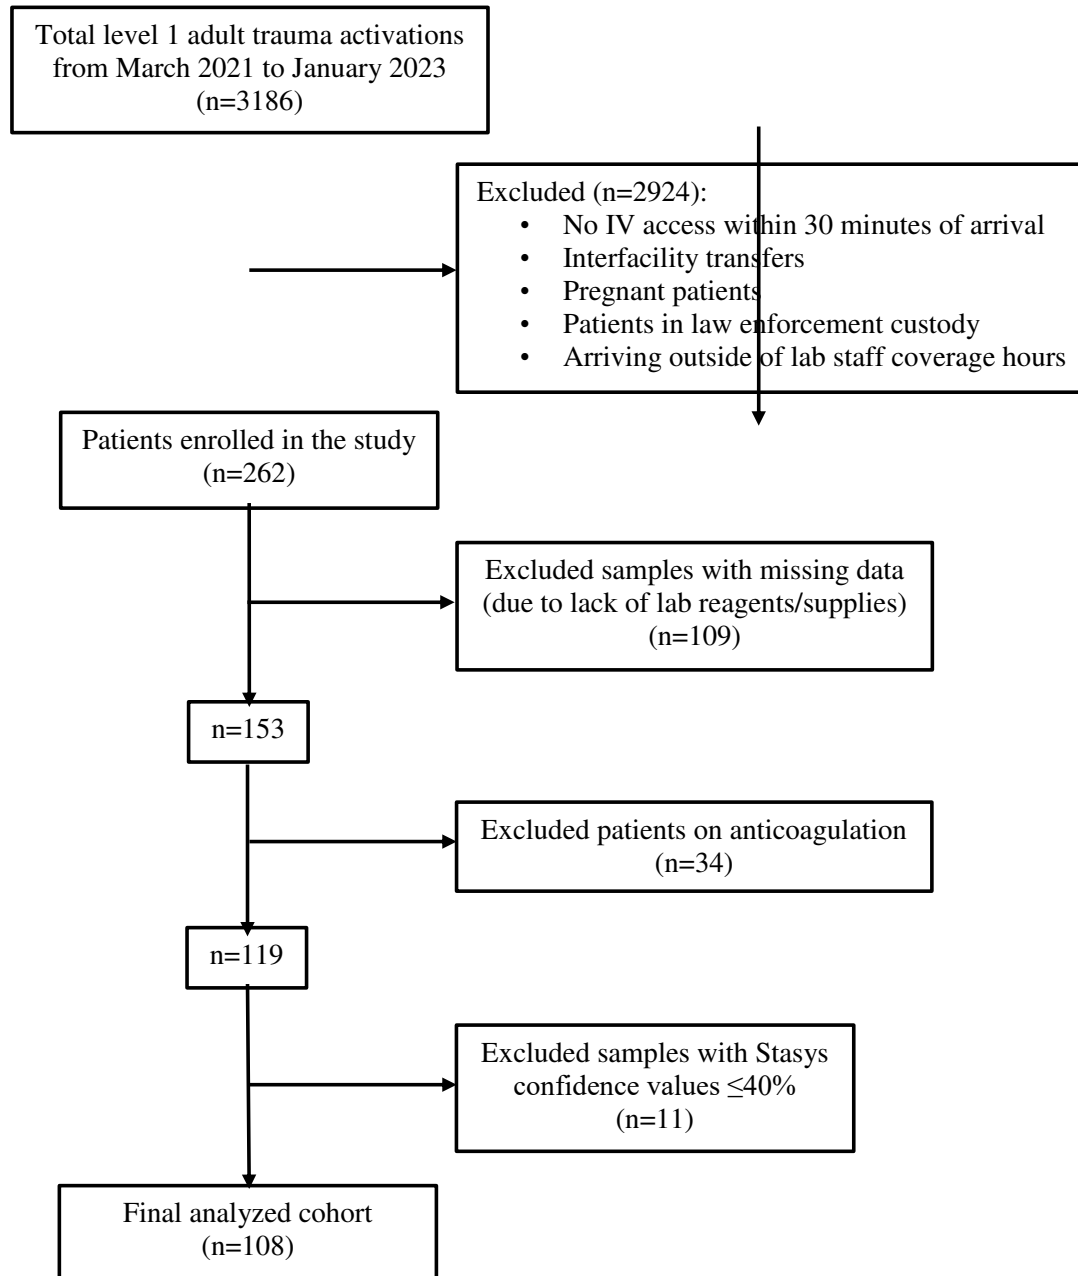

SDC 1. Consort diagram for inclusion and exclusion criteria for study cohort.

Supplement: tsaco-2024-001403supp001.pdf [file tsaco-2024-001403supp001.pdf]
